# Supplementary material for: Gait Patterns in Patients with Hereditary Spastic Paraparesis
Source: PLoS One. 2016 Oct 12;11(10):e0164623. doi: 10.1371/journal.pone.0164623 (PMC5061421; doi:10.1371/journal.pone.0164623)
Supplement: S1 Data — (XLSX) [file pone.0164623.s001.xlsx]

## Sheet: Patients
Patients	HSP subgroups	Gait speed	Stance duration	Swing duration	1st double support duration	2nd double support duration	Cadence	Step length	Step width	RoM hip	RoM knee	RoM ankle	RoM trunk lateral bending	RoM trunk flexion extension	RoM trunk rotation	RoM pelvis obliquity	RoM pelvis tilt	RoM pelvis rotation	TMCfArea_Ankle	TMCfArea_Knee
1)	1	1.08471	65.2267	34.0739	17.4378	17.4378	0.960123	0.600221	0.23941	23.2435	25.148	10.9548	6.75319	3.42961	15.2875	4.64622	67.5569	19.3802	20.3244	17.3608
2)	1	1.33063	69.6479	30.3521	17.9242	15.5765	0.841784	0.546505	0.459764	25.6753	39.1417	13.2015	5.97583	4.23319	9.64217	3.47899	56.2169	7.19279	21.1979	20.6171
3)	1	2.239	71.704	28.296	22.7472	21.8643	0.5481	0.473711	0.289208	29.3526	36.4483	15.2692	9.17798	6.40757	50.0917	4.45944	152.941	22.5844	23.5638	14.5322
4)	1	0.390329	64.6019	33.3802	20.8675	17.172	0.755948	0.570719	0.390666	24.7532	37.1438	2.70318	8.45731	9.49219	42.1856	4.34977	70.0736	14.455	34.1609	21.251
5)	1	0.524115	76.549	23.8743	23.8072	25.5327	0.50357	0.517909	0.280242	23.6087	34.9611	16.0346	4.83566	3.84841	24.439	4.69209	101.934	15.2167	23.3923	16.6572
6)	1	3.34019	69.4862	31.3476	17.6599	19.3788	0.672163	0.590951	0.28173	30.5522	43.6358	27.2727	1.41303	2.69061	15.7042	3.69015	113.93	15.0235	23.378	25.1465
7)	1	0.296847	60.8974	39.0533	11.8343	12.426	0.961538	0.702043	0.297608	25.8209	38.3583	6.24648	6.21962	4.74092	44.8279	4.5368	127.64	22.0152	22.4282	11.1999
8)	1	3.25897	84.6608	15.7657	33.0369	32.0765	0.427599	0.442063	0.422599	30.5761	37.1558	22.5793	11.5167	6.40757	7.0614	4.3839	85.2098	10.6126	16.3977	18.137
9)	1	1.56228	83.7693	37.947	10.6595	32.5722	0.34935	0.634097	0.386842	30.7496	35.2499	22.9471	4.30101	3.40457	6.08869	3.5924	118.141	10.6775	28.5558	22.1141
10)	1	2.74301	65.9418	34.9993	18.7431	13.7446	0.93851	0.749397	0.330633	33.6429	35.5934	19.8843	4.17165	3.93378	57.6257	3.9161	98.4304	11.8115	22.6694	32.7227
11)	1	0.808499	83.487	16.513	36.3424	31.0033	0.329711	0.448527	0.434414	19.5896	10.4985	13.9591	11.6265	4.80348	19.571	9.88972	158.868	24.4748	22.4854	36.4508
12)	1	1.4705	83.6822	11.9482	20.7783	50.6759	0.281351	0.482388	0.340381	31.4238	41.4227	12.1594	6.89749	9.00625	16.9206	5.56808	135.403	27.7944	22.623	28.9212
13)	1	2.93926	63.3597	37.947	10.6595	13.6076	0.774992	0.713789	0.301421	38.6552	38.6552	32.5144	6.64365	3.38918	68.4746	9.4895	95.7689	25.1206	16.0511	11.4201
14)	1	1.05949	72.4858	25.6458	19.3727	23.4317	0.56926	0.520672	0.220286	21.606	34.6356	19.0398	6.97177	10.1413	34.5447	4.28515	136.297	17.3388	16.3977	22.1141
15)	1	3.24	66.6763	33.3237	12.7976	15.6106	0.832084	0.684708	0.34161	32.5857	39.6114	17.1305	3.98315	2.07552	11.2637	4.34254	62.6643	13.4227	22.6694	32.7227
16)	1	0.358159	79.712	18.2469	9.28574	50.6912	0.436492	0.432584	0.252615	31.6734	27.9136	11.2018	6.64361	12.1283	36.6432	4.4475	120.579	14.3655	23.378	14.5322
17)	1	2.36697	65.7687	34.2313	19.1482	13.549	1.04873	0.498343	0.381881	29.5882	34.3171	16.4101	4.92937	4.60792	13.6381	5.15932	106.706	12.9567	22.4854	21.251
1)	2	2.20429	57.7257	42.4582	9.34862	9.7023	0.807706	0.777731	0.251755	35.4174	44.4329	22.0099	4.54558	1.905	18.7129	4.08872	92.6757	18.8742	28.1568	26.6776
2)	2	2.6347	64.8401	35.2117	14.855	15.6897	0.793942	0.648751	0.297172	35.2321	49.9494	19.5635	6.1096	4.18091	39.2538	1.96682	75.6331	10.3503	10.9478	15.19
3)	2	4.00683	66.9207	33.0335	19.0391	16.9563	0.752599	0.705799	0.358107	37.9035	45.6121	23.4181	2.77283	3.00718	11.3534	3.62469	92.0424	7.9271	14.4412	28.44
4)	2	2.41407	65.0401	35.0469	15.2083	14.179	0.858396	0.888956	0.360081	33.6847	46.9104	17.5717	4.10903	2.70966	27.586	6.30951	37.0275	30.6227	25.8167	12.1865
5)	2	4.42702	67.2564	32.2899	16.4121	18.7161	0.75302	0.613241	0.285168	39.8694	39.7775	27.7367	5.44522	1.99147	11.1271	3.51335	139.499	6.48288	12.9766	13.7566
6)	2	2.84975	63.1524	37.6724	13.8325	11.4344	0.933237	0.800731	0.219574	34.7127	45.7753	24.4056	7.69973	89.8783	17.4419	9.44751	94.1293	17.7291	30.8744	43.0287
7)	2	0.733497	65.46	34.4447	14.2278	14.9289	0.810782	0.732777	0.263527	33.0884	36.8911	8.64595	7.4163	2.28044	26.915	6.2192	67.8539	21.6039	29.4558	28.3587
8)	2	1.7037	76.8858	30.7252	37.9162	31.2023	0.207612	0.486657	0.23148	41.3496	36.7842	33.8634	12.7922	10.0871	10.899	6.40862	127.057	23.2813	42.8447	18.4078
9)	2	1.41929	75.0296	25.274	32.1517	24.3026	0.35137	0.446866	0.275709	37.4988	41.8217	10.754	8.64262	9.06147	6.89624	7.09237	80.2204	14.8051	18.7665	10.3861
10)	2	4.24558	75.2195	25.2155	23.4721	27.1678	0.579772	0.651805	0.386668	40.6669	48.7464	15.9398	7.21608	5.19412	15.8679	7.944	79.5784	11.9517	27.267	22.3141
11)	2	0.530043	72.1851	27.7391	22.8158	23.3557	0.62906	0.572763	0.339917	44.0495	53.4045	15.1788	5.77082	4.25745	38.6568	3.4828	92.3571	12.7262	21.9652	16.2234
12)	2	2.64498	54.9637	44.2118	10.5105	10.131	0.985497	0.833421	0.313585	35.4002	42.8277	18.2547	8.60872	6.90705	18.8064	6.70815	64.3211	14.4619	16.894	9.85272
13)	2	2.70474	82.1046	14.9389	29.9422	35.8244	0.279718	0.504448	0.35973	35.7805	31.9803	18.3834	12.7166	10.0971	68.4746	4.18426	95.7689	9.90598	16.5862	21.1526
14)	2	2.98525	66.1337	33.8663	13.0283	14.014	0.793392	0.715128	0.360189	35.919	36.837	14.3166	3.94249	5.67617	19.9295	3.70887	54.7806	24.9675	21.9652	18.4078
15)	2	0.453478	62.1708	36.776	13.0378	12.3074	0.779861	0.699659	0.334807	34.6203	37.1901	12.1413	5.46118	1.90651	14.4623	4.07508	78.9907	15.5195	12.9766	21.251
16)	2	1.7266	67.9167	28.0851	13.2948	10.6936	0.625	0.655794	0.398119	31.1082	31.7027	17.9501	7.13246	3.71293	15.5709	6.70815	36.3307	25.3805	18.7665	17.3608
1)	3	3.0014	59.3034	40.9176	10.331	9.24508	0.952424	0.8976	0.24538	39.3344	52.6458	21.36	3.99348	2.66746	53.7618	14.4571	54.7013	51.1352	14.495	12.1446
2)	3	1.19454	63.9278	36.0722	11.4225	18.8463	0.679051	0.707878	0.348334	47.3604	58.9593	21.6274	2.16225	2.22206	6.63165	5.36471	115.53	15.0318	18.4829	10.4153
3)	3	3.29964	71.0053	27.5471	19.493	19.6521	0.668396	0.531195	0.296717	44.4404	50.638	20.8803	3.59089	3.75617	24.7263	4.53474	37.1264	7.46799	17.3433	15.9404
4)	3	1.82311	63.341	36.1976	14.8598	12.8207	0.829616	0.785519	0.255303	39.0605	55.4347	22.76	11.0001	3.67389	16.6809	8.49378	74.177	13.6014	12.0353	14.1766
5)	3	4.21731	60.5091	39.4909	11.2073	12.2361	0.970267	0.831091	0.272639	34.3237	57.6581	18.5364	9.27841	2.71288	46.3839	7.29437	88.2639	13.1697	21.4072	17.4424
6)	3	3.07395	63.4401	36.9393	13.924	12.91	0.837692	0.753624	0.29739	46.2139	56.8848	29.2106	6.17998	2.71284	15.3468	5.39072	90.4528	11.7105	18.2234	13.6483
7)	3	4.68085	65.3388	34.3958	14.7144	15.4772	0.858358	0.872097	0.260482	38.7191	51.6078	32.2333	7.19561	2.07682	23.0514	7.70232	63.1039	20.0587	18.2791	20.7848
8)	3	3.7674	76.4415	23.0413	32.8586	24.8351	0.141724	0.49431	0.238078	45.9467	65.9093	35.5033	7.94275	9.55659	4.79909	6.7575	139.778	8.07341	21.9656	14.8452
9)	3	2.75436	65.5784	34.8598	14.181	15.4339	0.743094	0.743654	0.287763	41.4042	57.1655	32.6769	4.22286	2.33809	13.3637	5.13995	70.3188	10.5276	17.9784	13.6296
10)	3	3.90495	61.051	39.4676	12.359	10.2411	0.811394	0.771511	0.260097	40.9883	61.7532	39.3204	2.73761	2.34721	11.1349	5.09731	117.127	15.4641	14.2077	23.9891
11)	3	4.89081	65.495	34.2765	16.548	14.6879	0.869275	0.797658	0.245296	38.8518	63.5284	24.9254	5.63826	3.26006	16.6171	6.36461	78.8063	14.0173	19.2394	16.6083
12)	3	2.00175	69.2887	31.8157	18.3974	15.8686	0.737511	0.686386	0.343703	31.5759	60.9597	41.9652	5.12357	3.80138	17.4019	4.90143	91.0516	15.5142	16.6125	10.8296
13)	3	3.29616	64.0597	35.9403	14.1572	14.1572	0.992804	0.804042	0.305173	38.6733	49.8067	27.4846	13.1315	3.33494	36.1809	10.6474	30.3308	35.1564	22.1741	18.5659
14)	3	3.73072	68.7143	29.8442	13.7427	18.4211	0.710645	0.622035	0.374443	33.3782	58.5293	25.0259	13.4687	4.29869	13.4517	7.87102	52.9306	15.2539	18.2234	13.6483
15)	3	2.45988	64.9621	35.0457	16.5165	13.4064	0.942884	0.739094	0.284514	42.021	57.5996	24.7004	2.92992	1.29485	30.4817	4.47782	117.787	14.9008	14.2077	13.6296
16)	3	3.6258	63.3676	36.3258	15.4665	14.3368	0.851973	0.807065	0.231654	36.8549	64.0773	38.4668	5.72367	2.46487	17.4159	6.25438	48.6682	19.4909	16.6125	16.6083
17)	3	4.16001	60.3374	38.0892	14.1493	14.1493	0.943064	0.952291	0.306225	40.1595	56.0841	29.9484	8.42474	2.63726	21.2434	7.67284	70.3968	21.4605	14.2077	10.7296

## Sheet: Controls
Controls	Gait speed	Stance duration	Swing duration	1st double support duration	2nd double support duration	Cadence	Step length	Step width	RoM trunk lateral bending	RoM trunk flexion extension	RoM trunk rotation	RoM pelvis obliquity	RoM pelvis tilt	RoM pelvis rotation	TMCfArea_Ankle	TMCfArea_Knee
1)	3.69814	67.3913	44.9848	14.5897	2.73556	0.911854	0.914429	0.2577	5.25521	3.33163	12.7797	11.0096	71.9032	65.15	18.6244	17.1218
2)	3.47013	63.5429	36.4571	12.763	14.3584	0.850214	0.808094	0.26093	4.60095	3.11592	11.8017	7.23516	78.2265	16.3586	14.0039	11.6803
3)	2.34773	66.3253	33.2395	17.0205	16.5236	0.64462	0.693724	0.231981	3.31565	3.43164	10.2255	5.76292	82.579	14.0717	7.37231	12.2219
4)	3.72309	65.3743	33.3179	14.1621	15.6409	0.886305	0.802945	0.240831	4.34096	2.51081	13.9584	5.39321	127.471	15.168	8.06084	13.7961
5)	3.95416	64.7938	34.2544	13.9019	15.7539	0.799056	0.906034	0.294902	2.46744	3.72196	16.972	6.14918	68.3704	20.5008	7.20776	18.8075
6)	3.15011	63.0296	34.2899	13.3689	12.7841	0.746414	0.745765	0.19567	4.70823	2.6156	13.9213	8.51695	62.3804	13.9295	15.2253	14.9139
7)	2.76143	68.8513	30.3795	18.5564	18.5646	0.692927	0.818623	0.262413	3.97466	3.09675	16.3782	5.85648	87.1335	18.0384	11.9401	14.6225
8)	3.78295	65.2439	35.7558	15.1163	17.0732	0.914634	0.801436	0.202214	9.8391	3.19945	24.8262	5.08088	64.1993	22.5538	9.95504	17.1527
9)	3.30329	65.9197	34.2745	14.8484	14.5017	0.829778	0.833343	0.152934	3.16789	4.0645	94.289	7.20917	81.3507	15.1332	17.0896	12.4988
10)	3.2556	65.8995	34.0378	15.7626	14.745	0.908511	0.784701	0.356553	4.887	2.49076	14.7052	6.02231	62.6328	15.315	12.252	15.8688
11)	2.26385	68.9685	32.8786	19.6879	17.3845	0.703059	0.667089	0.343137	1.1752	3.18692	11.5505	3.4988	83.3447	10.7649	12.4942	18.2764
12)	3.43762	62.9353	38.1773	13.6253	13.1841	0.746269	0.928445	0.325971	4.14471	3.38768	16.5109	6.60276	140.839	17.3869	17.1972	14.5905
13)	3.41009	65.6798	32.8866	15.254	15.254	0.738098	0.874604	0.331952	7.89047	1.73444	63.2162	5.23265	110.09	14.9927	10.2672	15.7324
14)	3.53637	64.7527	35.2473	18.533	15.5018	0.802742	0.832577	0.3245	3.69263	3.50038	7.53289	5.40885	98.6852	13.1156	14.6727	17.0799
15)	2.45313	66.6792	31.9196	19.0654	16.0419	0.641209	0.621226	0.207951	3.29251	3.13059	6.65673	4.55714	93.9634	14.8291	11.5044	20.927
16)	2.78708	64.1453	36.2152	16.3308	14.1927	0.766877	0.689456	0.280919	1.98944	3.00777	12.8435	3.17079	118.593	12.1348	11.3161	11.3754
17)	2.72693	65.1553	35.1072	14.1264	14.4697	0.780653	0.715329	0.256522	3.48155	2.16822	12.0887	3.65191	63.3552	12.2156	19.9116	27.3557
18)	2.52463	66.7737	33.3667	13.0194	16.3439	0.79441	0.681937	0.343467	6.66279	2.13811	11.9152	4.13829	98.1908	18.5378	11.3234	26.4832
19)	2.46955	66.3037	32.4321	13.0194	15.8552	0.702541	0.674539	0.266355	2.92438	2.08686	8.16627	6.36296	84.2031	11.2354	16.7659	15.2294
20)	2.95429	65.4842	36.4322	13.9302	13.9302	0.724107	0.770347	0.259237	2.40266	4.49278	7.98253	6.30482	147.785	14.007	12.533	11.6803
21)	2.42863	64.9766	35.0234	15.7635	15.2647	0.72934	0.678735	0.291226	5.25282	3.12209	8.06941	4.0385	130.274	9.86219	17.8842	12.2219
22)	2.18235	70.1331	30.4846	17.1242	19.3372	0.656245	0.563853	0.234231	6.31749	3.73479	5.67544	3.77688	94.4848	7.54126	9.49925	13.7961
23)	3.61863	65.7143	34.5088	19.2453	15.5844	0.779221	0.816916	0.294916	3.53481	2.85026	7.82596	3.86737	129.706	10.1524	16.5782	11.3754
24)	2.24915	66.403	33.3245	19.2453	16.8506	0.714977	0.544845	0.231126	1.72149	2.11663	5.35182	3.38116	62.8331	4.46789	12.4942	18.2764
25)	2.72334	64.6907	35.8744	19.2453	19.8454	0.773196	0.672006	0.275433	4.75322	2.31887	10.6503	4.098	71.1123	10.2803	11.5044	14.5905
26)	2.13215	68.6111	31.2544	15.8177	18.379	0.60461	0.68133	0.285938	1.33654	5.11522	8.95049	5.66551	85.3169	19.0865	19.9116	15.7324
27)	2.65053	67.3212	32.9024	16.8536	16.5271	0.72084	0.749101	0.283695	4.55971	1.66773	10.7765	5.16688	85.5662	16.2302	17.0896	18.2764
28)	1.64547	70.7407	29.2593	15.7005	15.9314	0.735294	0.686799	0.272609	4.92545	3.47497	4.73889	6.02524	75.9185	10.4374	10.2672	15.7324
29)	1.99097	68.7524	31.3436	15.7005	17.9381	0.573367	0.583513	0.246257	3.14998	2.85188	5.05584	2.88116	84.6704	10.4972	15.2253	17.0799
30)	2.52017	64.6053	35.2253	13.7001	14.0607	0.761647	0.638739	0.273106	2.19306	1.51636	7.05759	2.5506	109.204	9.12151	14.6727	20.927
31)	1.05788	74.4577	25.4017	25.2586	26.0639	0.428477	0.575144	0.388699	3.45462	1.76706	2.53965	4.91703	55.3929	7.80353	19.9116	11.3754
32)	2.0244	69.3308	29.471	20.2486	18.8136	0.615007	0.579479	0.266507	2.73909	4.01326	8.22347	6.4427	82.4762	8.03856	16.5782	27.3557
33)	2.46157	68.6386	32.3125	19.1535	17.2357	0.698526	0.742871	0.248277	3.05303	2.01336	16.932	6.5237	48.2048	15.331	11.5044	18.8075
34)	2.74315	66.753	33.247	15.8108	17.7298	0.657119	0.724898	0.213733	2.4408	2.78217	6.71504	6.13037	122.495	11.3396	9.95504	14.9139
35)	1.67009	70.9991	29.5596	21.7175	19.8017	0.593177	0.526581	0.282128	4.28575	3.1776	5.53895	3.58758	52.7373	8.60189	7.37231	14.6225
36)	3.48687	64.383	35.2449	14.4593	15.5065	0.799964	0.804565	0.255329	4.6944	2.37789	10.6375	6.86442	84.5986	9.37788	12.533	17.1527
37)	2.42543	68.1466	31.7597	17.1667	18.4005	0.68307	0.718397	0.358508	2.01862	2.02269	13.8408	3.96111	130.592	15.0392	11.5044	18.2764
38)	1.94433	68.8009	30.3015	13.7662	20.0192	0.554338	0.63661	0.236073	1.81341	3.44928	16.9084	4.95385	127.271	10.7035	18.6244	15.7324
39)	3.16578	65.522	33.8881	16.0321	16.1064	0.795382	0.723125	0.307195	2.7389	2.84276	12.2067	4.24742	64.4977	11.3482	15.2253	17.0799
40)	3.0777	67.0069	33.3157	16.6088	16.6796	0.763776	0.77072	0.345023	4.81457	3.67643	12.9911	3.94254	93.8249	11.6702	14.0039	11.6803
41)	2.83847	66.1327	32.9833	16.1234	16.7435	0.71018	0.707285	0.288206	1.57046	4.11606	7.91105	4.1833	101.972	10.0718	14.6727	27.3557
42)	1.70156	69.7188	29.147	18.5517	19.4304	0.416148	0.754262	0.30082	3.43979	2.83899	7.94289	6.4622	93.9398	19.3763	9.49925	26.4832
43)	3.06981	67.056	33.1755	17.4968	16.4276	0.732234	0.812449	0.350598	3.13899	2.62761	18.6168	4.75559	51.5776	16.2885	10.2672	15.2294
44)	2.6709	67.3826	32.6174	16.4562	17.1459	0.762128	0.715064	0.232775	4.1983	3.55231	8.12905	5.59223	75.974	12.1393	11.3161	20.927
45)	2.21347	68.0191	31.8572	17.4397	18.1579	0.626347	0.750275	0.292285	2.18506	1.93962	8.98918	4.40794	178.684	10.1972	7.37231	17.0799
46)	1.60125	72.5833	27.1295	23.6868	23.6868	0.48984	0.608576	0.300414	4.39389	2.24906	12.2004	3.94277	64.321	9.41729	18.6244	11.3754
47)	2.59327	66.9875	33.5007	15.7071	17.3722	0.681307	0.696597	0.241607	1.74883	2.42432	8.18301	5.01812	86.3168	10.3243	12.252	27.3557
48)	1.42596	71.9989	28.7122	20.4109	22.6483	0.488599	0.64828	0.392014	6.48158	3.11272	6.43841	6.71625	74.733	13.3563	11.5044	18.8075
49)	1.68599	69.1865	29.3259	21.6593	19.8994	0.5309	0.637896	0.310243	3.31561	2.61161	8.71691	3.69115	123.672	11.8404	10.2672	14.9139
50)	1.38394	72.2525	28.299	19.5677	22.8725	0.49275	0.586922	0.213906	1.66599	3.07731	1.83127	2.91378	47.078	3.01657	12.4942	26.4832
